# Supplementary material for: Biomimetic layer-by-layer Co-mineralization approach towards TiO2/Au nanosheets with high rate performance for lithium ion batteries
Source: Royal Society of Chemistry journal article supplement (doi:10.1039/c3nr03476c), 2013-01-01
Supplement: c3nr03476c.pdf [file c3nr03476c.pdf]

*Electronic Supplementary Information For*

Biomimetic Layer-by-Layer Co-mineralization Approach Towards  
TiO<sub>2</sub>/Au Nanosheets With High Rate Performance for Lithium Ion  
Batteries

*Bo Hao, Yong Yan, Xiaobo Wang and Ge Chen\**

College of Environmental & Energy Engineering, Beijing University of Technology, Pingleyuan  
100, 100124, Beijing, P.R. China.

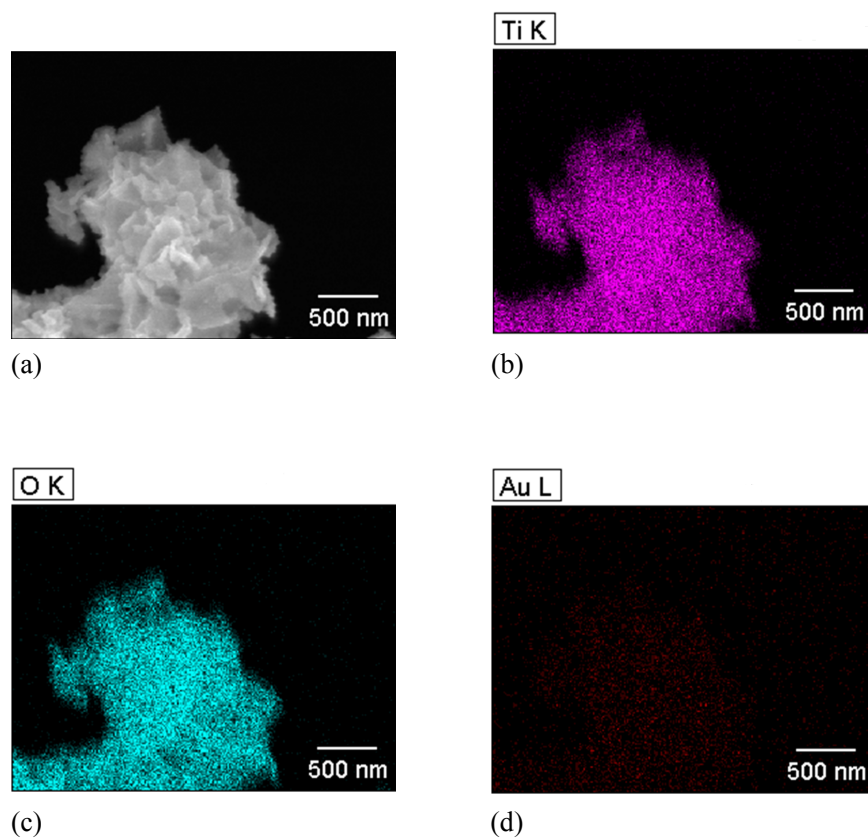

**Figure S1** (a) the SEM image of  $\text{TiO}_2/\text{Au}$  nanosheets; (b) the EDX mapping of Ti species of  $\text{TiO}_2/\text{Au}$  nanosheets; (c) the EDX mapping of O species of  $\text{TiO}_2/\text{Au}$  nanosheets; (d) the EDX mapping of Au species of  $\text{TiO}_2/\text{Au}$  nanosheets.
